# Supplementary material for: Titanate nanotubes as an efficient oral detoxifying agent against drug overdose: application in rat acetaminophen poisoning
Source: Royal Society of Chemistry journal article supplement (doi:10.1039/d2na00874b), 2023-01-01
Supplement: d2na00874b1.pdf [file d2na00874b1.pdf]

## Supporting Information

### **Titanate nanotubes as an efficient oral detoxifying agent against drug overdose: application in rat acetaminophen poisoning**

Abir Salek,<sup>1§</sup> Mouna Selmi,<sup>1§</sup> Leila Njim,<sup>2</sup> Polona Umek,<sup>3</sup> Philippe Mejanelle,<sup>4</sup> Fathi Moussa,<sup>4</sup> Wahiba Douki,<sup>5</sup> Karim Hosni,<sup>1</sup> Tarek Baati<sup>1\*</sup>

*§ Abir Salek and Mouna Selmi contributed equally*

\* Corresponding Author Dr. Tarek BAATI: [tarek.baati@gmail.com](mailto:tarek.baati@gmail.com). Laboratoire des Substances Naturelles, Institut National de Recherche et d'Analyse Physico-chimique, Biotechpôle Sidi Thabet, 2020 Tunisie. Tel : (+216) 71 537 666, Fax : (+216) 71 537 688.

<sup>1</sup> Laboratoire des Substances Naturelles, Institut National de Recherche et d'Analyse Physico-chimique, Biotechpôle Sidi Thabet, 2020 Tunisie.

<sup>2</sup> Service d'Anatomie Pathologique, EPS Fattouma Bourguiba de Monastir, Faculté de Médecine de Monastir ; Université de Monastir, 5000 Monastir, Tunisie.

<sup>3</sup> Jožef Stefan Institute, Jamova cesta 39, SI-1000 Ljubljana, Slovenia.

<sup>4</sup> Laboratoire d'Etude des Techniques et Instruments d'Analyse Moléculaire, IUT d'Orsay, Université Paris Sud XI, Plateau de Moulon, 91400 Orsay, France.

<sup>5</sup> Laboratoire de Biochimie et de Toxicologie, EPS Fattouma Bourguiba de Monastir, Université de Monastir, 5000 Monastir, Tunisie.

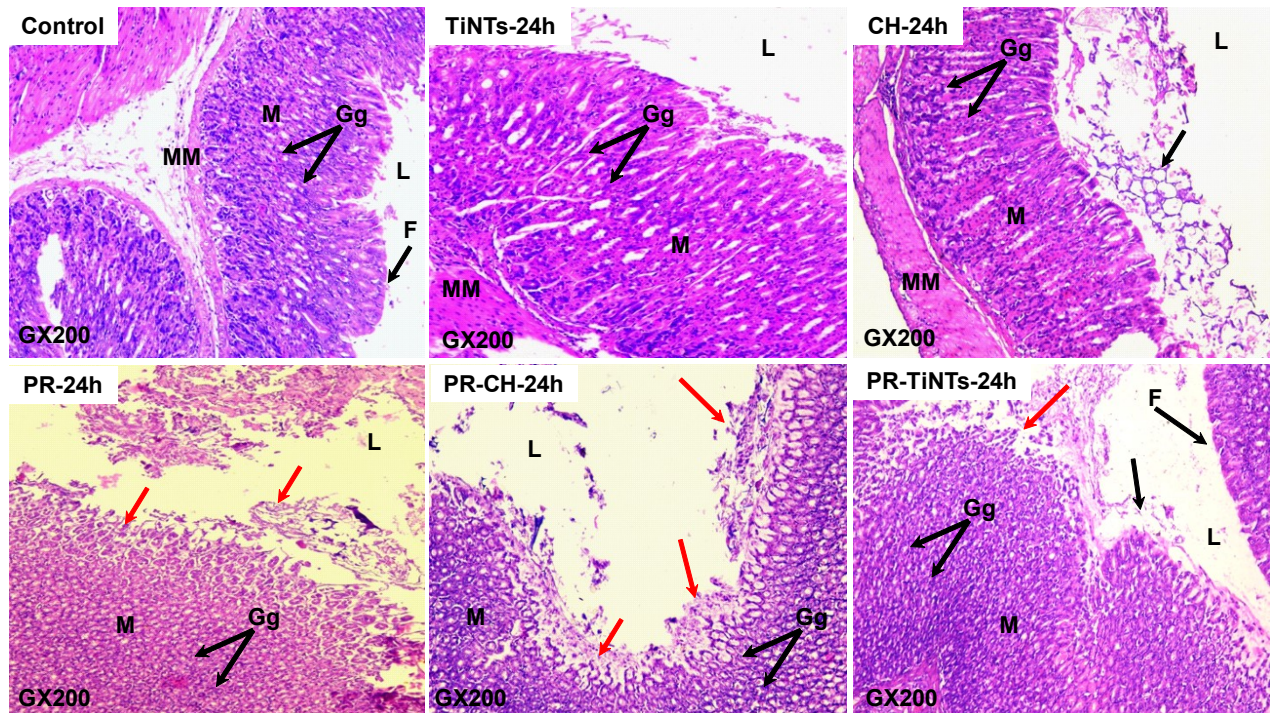

**Figure S1** Histological sections of rat gastric mucosa after 24 h of Ringer, TiNTs, CH (negative controls), PR (positive control), PR-TiNTs and PR-CH administration. Red arrows indicate ulcer formation and cellular desquamation (M: Mucosa, MM: Muscularis Mucosae, F: Foveolar, Gg: Gastric glands, and L: Lumen).

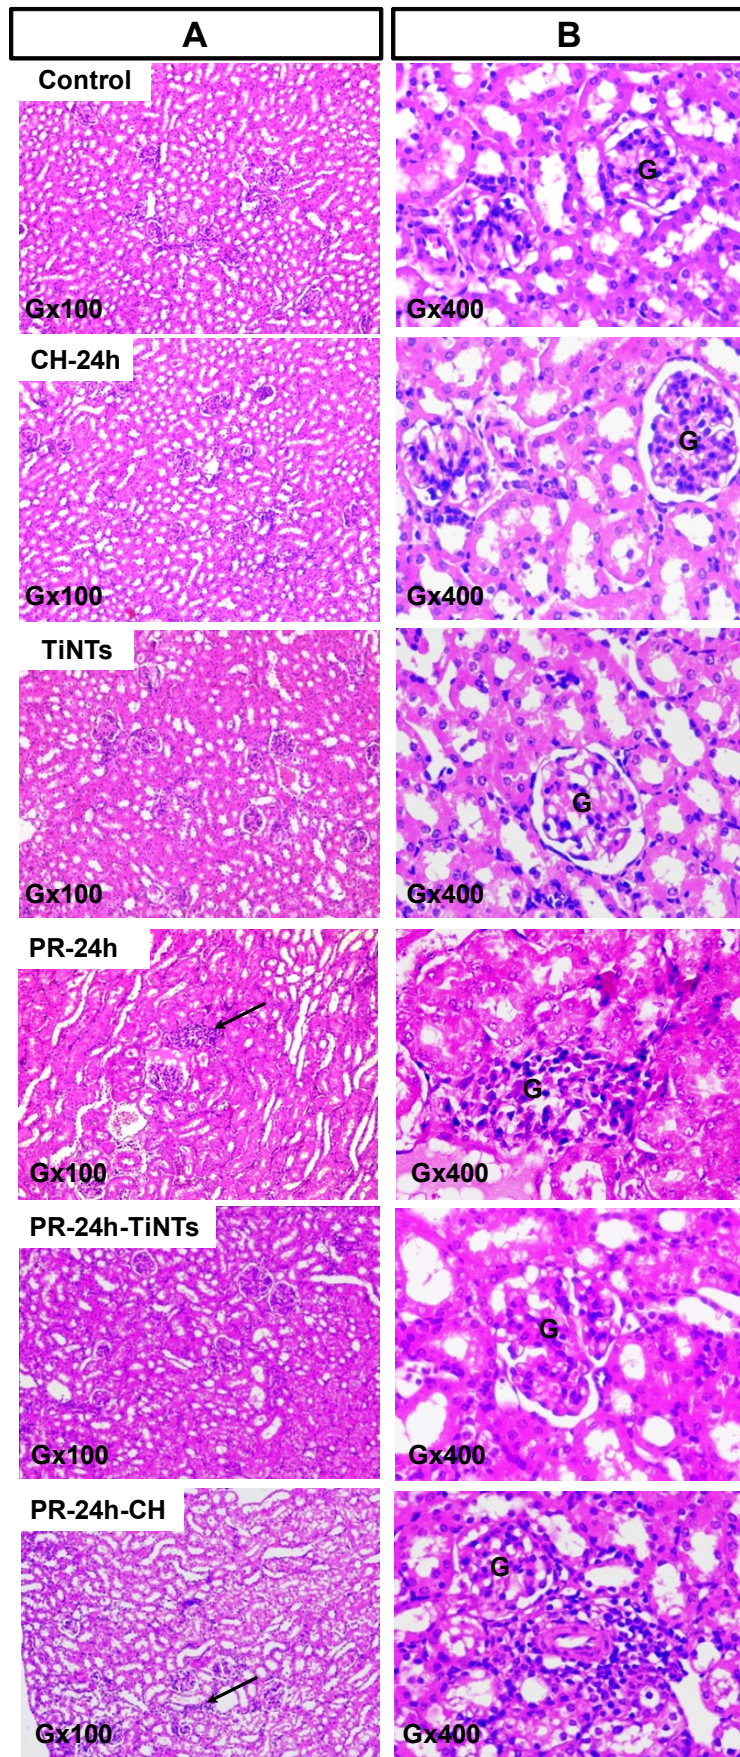

**Figure S2 (A)** Histological sections of rat kidneys after 24 h of Ringer, TiNTs, CH (negative controls), PR (positive control), PR-TiNTs and PR-CH administrations. Sections are stained with H&E. **(B)** is magnification of **(A)**. G= glomerulus. Arrows indicated neutrophils infiltration.

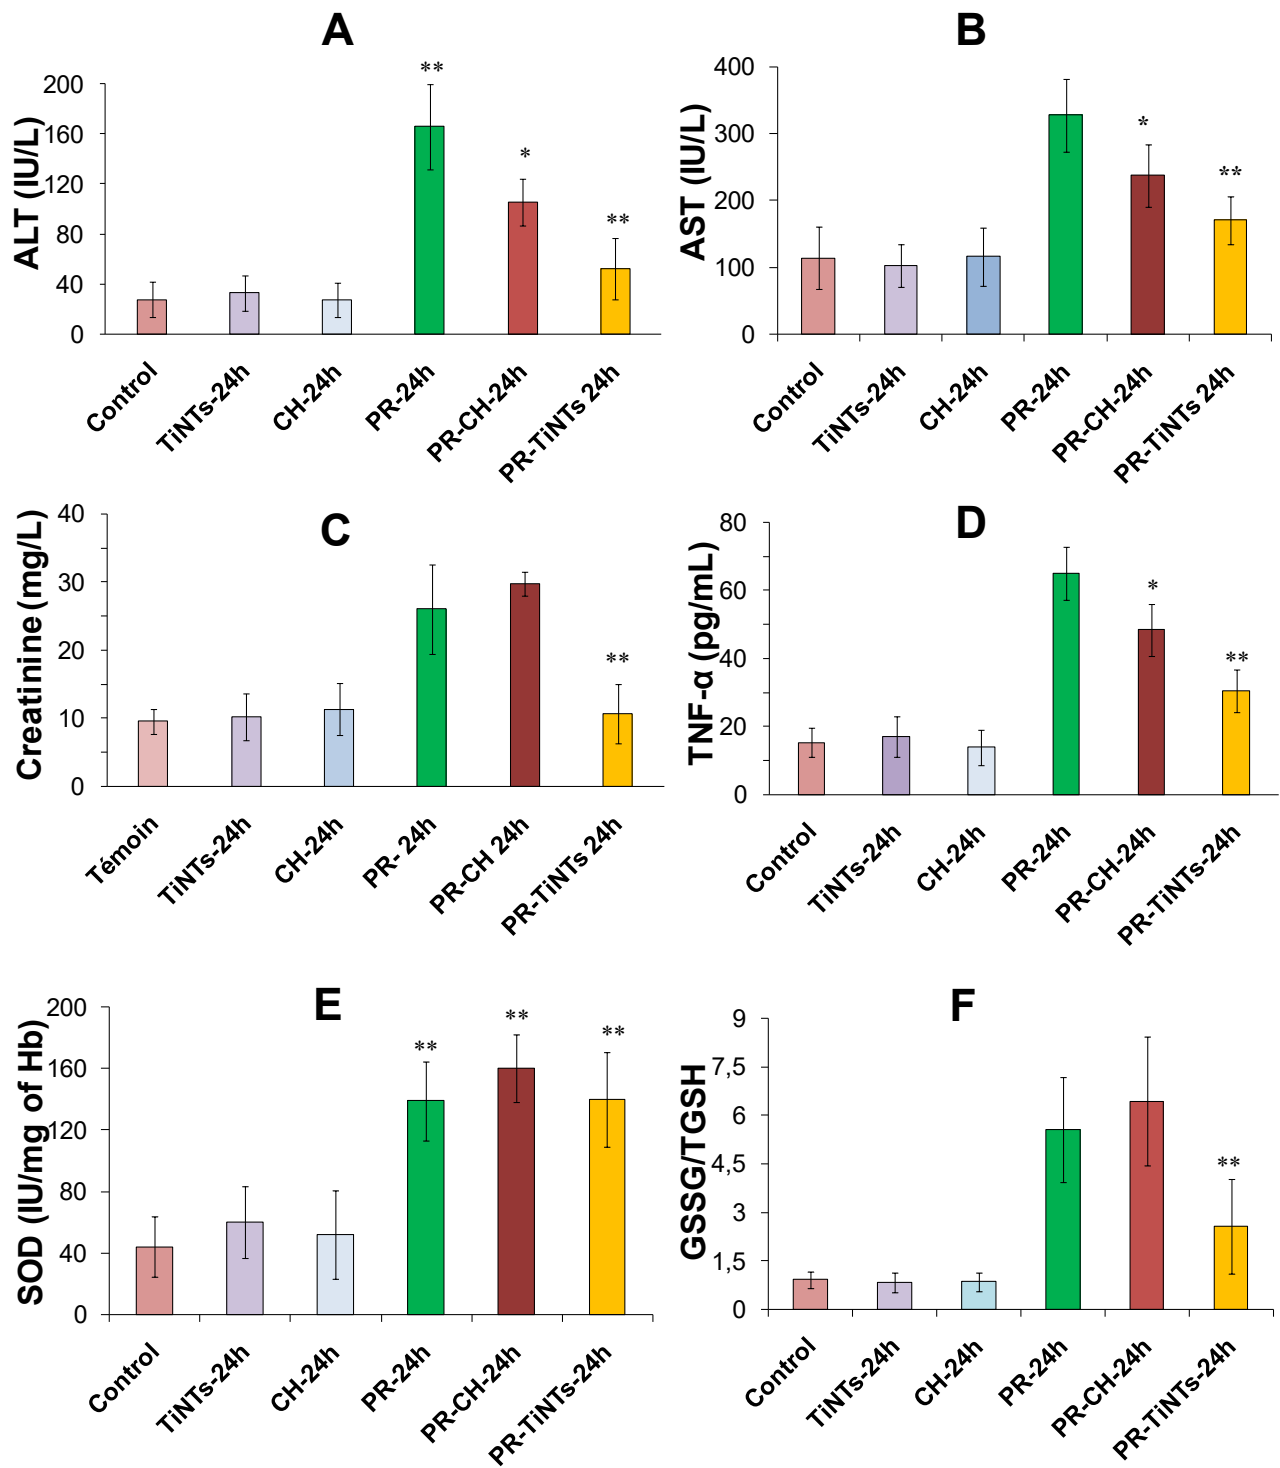

**Figure S3** Serum levels of biochemical markers of animals after 24h of Ringer, TiNTs, CH (negative controls), PR (positive control), PR-TiNTs and PR-CH orally administrations: **(A)** alanine aminotransferase (ALT), **(B)** aspartate aminotransferase (AST), **(C)** Creatinine, **(D)** TNF- $\alpha$ , **(E)** Superoxide dismutase (SOD) and **(F)** circulating levels of oxidized glutathione/total glutathione ratio (GSSG/TGSH). Data are the mean  $\pm$  SD for six rats. Statistical significance was determined by Tukey HSD test (\* $p < 0.05$ , \*\*  $p < 0.01$ ).

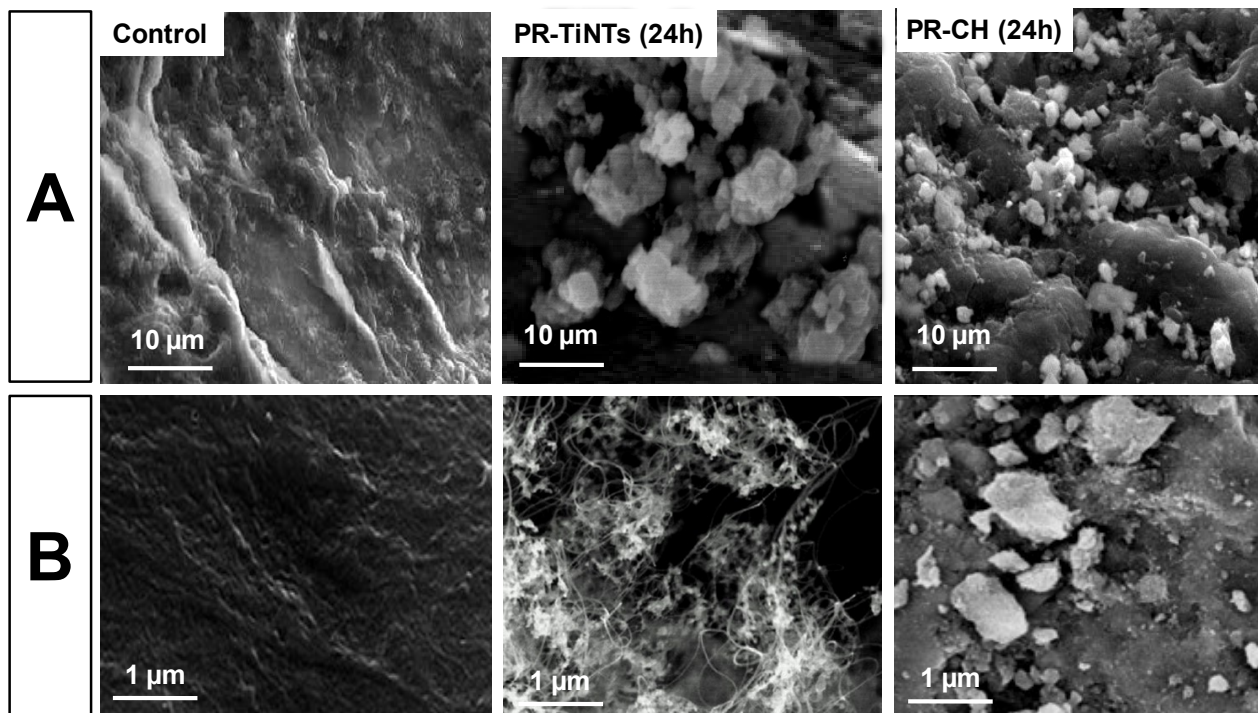

**Figure S4** FEG-SEM images of feces of control animals and animals overdosed with PR and treated with TiNTs (PR-TiNTs) or activated charcoal (PR-CH) for 24h showing the presence of TiNTs or CH aggregates. **B** is a magnification of **A**.
